# Supplementary material
Source: HighWire-hosted journal article supplement (https://www.jpn.ca/highwire/filestream/89597/field_highwire_adjunct_files/0/jpn-150138-1-at.pdf)
Supplement: jpn-150138-1-at.pdf [file jpn-150138-1-at.pdf]

**Appendix 1** to Stacey D, Lourdusamy A, Ruggeri B, et al. A translational systems biology approach in both animals and humans identifies a functionally related module of accumbal genes involved in the regulation of reward processing and binge drinking in males. *J Psychiatry Neurosci* 2015.

DOI: 10.1503/jpn.150138

Copyright © 2015 The Author(s) or their employer(s). To receive this resource in an accessible format, please contact us at [cmajgroup@cmaj.ca](mailto:cmajgroup@cmaj.ca). *Online appendices are unedited and posted as supplied by the authors.*

### **Supplementary methods**

**Quality control of human genotype data.** SNPs with call rates of <98%, minor allele frequency <1% or deviation from the Hardy-Weinberg equilibrium ( $P \leq 1 \times 10^{-4}$ ) were excluded from the analyses. Individuals with an ambiguous sex code, excessive missing genotypes (failure rate >2%), and outlying heterozygosity (heterozygosity rate of 3 SDs from the mean) were also excluded. Identity-by-state similarity was used to estimate cryptic relatedness for each pair of individuals using PLINK software<sup>1</sup>. Closely related individuals with identity-by-descent (IBD > 0.1875) were eliminated from the subsequent analysis. Population stratification for the GWAS data was examined by principal component analysis (PCA) using EIGENSTRAT software<sup>2</sup>. The four HapMap populations were used as reference groups in the PCA analysis and individuals with divergent ancestry (from CEU) were also excluded.

**Mouse gene coexpression network analysis and module characterization.** Unlike the standard gene co-expression network analysis, WGCNA assigns a connection weight to each gene pair using soft-thresholding and thus is robust to parameter selection. The determination of weighted co-expression starts by calculating a correlation matrix containing all pairwise Pearson correlations between all probe sets across all samples. It then uses the power function parameter  $\beta \geq 1$  to convert correlation matrix into an adjacency matrix. For this data set, we select the smallest  $\beta$  ( $= 8$ ) that leads to an approximately scale-free network with the truncated scale-free fitting index  $R^2 > 0.8$ . To explore the modular structures of the co-expression network, the adjacency matrix is further transformed into a topological overlap matrix TOM and then modules of highly correlated transcripts were identified using average linkage hierarchical clustering followed dynamic tree-cut algorithm. Once modules were identified, each module was represented by the module eigengene (ME; i.e., first principal component of the expression values across subjects). The MEs were then correlated to relevant phenotypes using the Pearson correlation. Within-module connectivity (kWithin) for each probe set was determined by summing the connectivity of that probe set with each other probe set in that module.

We used the following strategies to characterize the modules: first, the MEs were associated with KO status and *Rasgrf2* gene expression levels; second, significantly associated modules obtained from the first step were annotated using gene ontology (GO) terms, marker genes for astrocytes, microglia, neurons, and oligodendrocytes obtained from the mouse gene expression data<sup>3</sup>, mouse quantitative trait loci (QTL) for alcohol preference<sup>4</sup>. To determine whether the modules are biologically meaningful, GO enrichment analyses were conducted using Gene Codis<sup>5</sup>. For each module, we examined enrichment of GO terms as compared to the list of reference genes using a Hypergeometric test. FDR < 0.05 were considered significant.

**Module-based GWAS signal enrichment analysis.** We utilized the following procedures to run the enrichment test<sup>6</sup>. First the max  $-\log(P\text{-value})$  of a SNP located at 100kb upstream or downstream of a gene was assigned to represent the gene, then gene set's enrichment scores (ES) were calculated based the gene's rank. Here, the list of genes in each module was considered as a single gene set. SNP label level permutation was used to generate a distribution of the ES, and then the distribution was normalized by multiplying the ratio of the proportion of significant

**Appendix 1** to Stacey D, Lourdasamy A, Ruggeri B, et al. A translational systems biology approach in both animals and humans identifies a functionally related module of accumbal genes involved in the regulation of reward processing and binge drinking in males. *J Psychiatry Neurosci* 2015.

DOI: 10.1503/jpn.150138

*Online appendices are unedited and posted as supplied by the authors.*

genes of the gene set and the proportion of significant genes of the total genes in the GWAS. FDR values were calculated if multiple gene sets were included in enrichment test.

**Kernel based association measure.** In brief, a kernel based canonical correlation analysis (CCA) is to solve a following eigen-problem between two joint Gaussian variables  $Y$  and  $X$ :

$$\begin{pmatrix} (K_Y + \lambda I)^2 & K_Y K_X \\ K_Y K_X & (K_X + \lambda I)^2 \end{pmatrix} \begin{pmatrix} \zeta_Y \\ \zeta_X \end{pmatrix} = (1 + \rho) \begin{pmatrix} (K_Y + \lambda I)^2 & 0 \\ 0 & (K_X + \lambda I)^2 \end{pmatrix} \begin{pmatrix} \zeta_Y \\ \zeta_X \end{pmatrix},$$

where  $K_Y$  and  $K_X$  are the Gram matrix of the sample calculated using the kernel function, and  $\lambda$  is a small regularization parameter to avoid overfitting. The kernel generalized variance statistics ('regularized kernel association' would be a more preferable name) is then defined as

$$rkassoc^{(k)} = -\sum_{i=1}^k \log(1 - \rho_i^2),$$

where  $\rho_i$  is the  $i^{\text{th}}$  leading eigenvalue of the regularized eigenproblem (minus one from the eigenvalue calculated directly from the matrices!!!). This is justified by the fact that the rest eigenvalues converge rapidly to 0, and therefore retaining these eigenvalues will not only contribute little to the association but also sacrifice the numerical stability. The thus defined kernel generalized variance approximates the mutual information between variables  $Y$  and  $X$  to the second level when the variables in question follow arbitrary distributions and 'near independency' (please refer to Bach & Jordan<sup>7</sup> for a detailed proof), and therefore  $rkassoc^{(k)} \approx 0$  if  $Y$  and  $X$  are independent.

To get the p-value under the NULL hypothesis, we used the permutation procedure. The columns of  $X$  were permuted for  $B$  times, and the permuted kernel generalized variance statistics were calculated and recorded. The empirical p-value was then calculated as the percent of permuted statistics exceeding the original one. We found that a gamma fit of the permuted statistics approximates the NULL distribution of statistics quite well and is especially useful when one is performing screening where statistical correction is required. We truncated the left most 2% tail of the permuted NULL to get a stable fit of the gamma distribution. A diagnostic QQ-plot was also produced along with the approximated p-value in case of deviation from the gamma fit, which happens if inappropriate regularization parameter or kernel function is chosen, or the distribution from the original space is too irregular given a small sample size. Intensive numerical simulations reveal no sign of inflated false positive rate of the kernel association measure (data not shown). Nevertheless, in this paper we only report the empirical p-values.

To control for the covariates, we eliminate the covariate effect from the original space of the data. As we expect no interactions between the covariates in this study, we enforce only the linear covariate removal procedure, where a linear model was applied on the main variables, e.g. SNPs and phenotypes, to regress out the covariates, e.g. research sites and gender, and the residual terms were then used to represent the corresponding main variable in the kernel based association analysis. A more general nonlinear covariate removal scheme should be enforced when nonlinear interaction between the covariates is expected and will be detailed in a separated article for more general applications. Simulation studies indicate that removing covariates from

**Appendix 1** to Stacey D, Lourdasamy A, Ruggeri B, et al. A translational systems biology approach in both animals and humans identifies a functionally related module of accumbal genes involved in the regulation of reward processing and binge drinking in males. *J Psychiatry Neurosci* 2015.

DOI: 10.1503/jpn.150138

*Online appendices are unedited and posted as supplied by the authors.*

either phenotype or SNP is more conservative than removing covariates from both of them, while both procedures show no sign of inflated false positives (data not shown).

For our current application, Gaussian kernels were used, and the determination of kernel bandwidth followed the recipe of <sup>7</sup>, the regularization parameter was set to 0.1. We permuted the sample 1, 000 times to get the empirical p-value. After the covariate removal procedure, the data were transformed to its rank divided by sample size before testing for the kernel association to smooth out possible outliers that might destabilize the algorithm.

### Supplementary tables

**Table S1. M5 module genes with differential gene expression between WT and *Rasgrf2*<sup>-/-</sup> and module membership.** logFC: fold change on log<sub>2</sub> scale between WT and *Rasgrf2*<sup>-/-</sup>; MM: module membership; kWithin: number of connections between a gene and other genes in a module

| Mouse Gene Symbol | Differential Expression |        |          | Module Membership |          |         | Human Gene Symbol |
|-------------------|-------------------------|--------|----------|-------------------|----------|---------|-------------------|
|                   | logFC                   | t      | P value  | MM                | P value  | kWithin |                   |
| Glrx1             | 3                       | 38.27  | 2.67E-20 | 0.99              | 2.29E-16 | 76.61   |                   |
| LOC666403         | 4.48                    | 59.71  | 3.67E-24 | 0.99              | 7.83E-16 | 76.23   |                   |
| 1200015F23Rik     | 2.15                    | 42.63  | 3.11E-21 | 0.99              | 1.23E-15 | 75.97   |                   |
| Tmem87a           | -2.38                   | -42.17 | 3.86E-21 | -0.99             | 3.11E-15 | 75.47   | TMEM87A           |
| Lrrc57            | 2.44                    | 34.6   | 1.98E-19 | 0.99              | 5.85E-15 | 75.23   | LRRC57            |
| Ccndbp1           | 1.43                    | 24.13  | 2.40E-16 | 0.99              | 2.59E-14 | 73.6    | CCNDBP1           |
| 9930021D14Rik     | 1.31                    | 22.86  | 6.85E-16 | 0.99              | 9.43E-14 | 72.98   |                   |
| Slc25a18          | 2.25                    | 23.78  | 3.19E-16 | 0.98              | 4.12E-13 | 72.8    | SLC25A18          |
| 2810410P22Rik     | 1.84                    | 19.75  | 1.17E-14 | 0.98              | 4.50E-13 | 71.23   |                   |
| Pla2g4b           | 0.43                    | 11.35  | 3.29E-10 | 0.98              | 7.04E-13 | 70.12   | PLA2G4B           |
| Gfer              | 0.66                    | 14.77  | 2.81E-12 | 0.98              | 2.45E-12 | 68.74   | GFER              |
| Cops8             | -2.91                   | -21.1  | 3.26E-15 | -0.98             | 3.08E-12 | 67.93   | COPS8             |
| Adamts9           | 0.85                    | 15.38  | 1.33E-12 | 0.98              | 3.24E-12 | 67.84   | ADAMTS9           |
| Eme2              | -1.74                   | -20.75 | 4.50E-15 | -0.98             | 5.20E-12 | 68      | EME2              |
| C920004C08Rik     | -0.98                   | -16.06 | 5.90E-13 | -0.98             | 5.72E-12 | 66.72   |                   |
| Slc39a9           | 0.65                    | 12.83  | 3.71E-11 | 0.97              | 9.06E-12 | 66.17   | SLC39A9           |
| Arrdc3            | 2.07                    | 16.82  | 2.47E-13 | 0.97              | 9.55E-12 | 68.47   | ARRDC3            |
| 2810423A18Rik     | 1.51                    | 17.65  | 9.99E-14 | 0.97              | 1.27E-11 | 68.02   |                   |
| Mad               | 1.21                    | 17.31  | 1.44E-13 | 0.97              | 1.33E-11 | 68.05   |                   |
| A330021E22Rik     | 1.28                    | 16.43  | 3.86E-13 | 0.97              | 1.52E-11 | 64.42   | C7orf63           |
| Arl5a             | 1.7                     | 16.24  | 4.80E-13 | 0.97              | 1.85E-11 | 66.31   | ARL5A             |
| LOC229810         | -1.64                   | -18.56 | 3.83E-14 | -0.97             | 2.81E-11 | 68.29   |                   |
| Zap3-pending      | 0.58                    | 13.07  | 2.65E-11 | 0.97              | 3.22E-11 | 65.62   |                   |
| Clstn1            | -1.51                   | -18.54 | 3.91E-14 | -0.97             | 4.05E-11 | 66.34   | CLSTN1            |
| Per3              | -0.77                   | -13.83 | 9.50E-12 | -0.97             | 6.43E-11 | 64.12   | PER3              |
| Vrk1              | 0.85                    | 13.51  | 1.45E-11 | 0.96              | 1.15E-10 | 62.83   | VRK1              |
| 2310002B06Rik     | -0.6                    | -12.66 | 4.71E-11 | -0.96             | 1.27E-10 | 61.92   |                   |
| Polr3f            | -0.38                   | -9.54  | 6.39E-09 | -0.96             | 1.96E-10 | 61.86   | POLR3F            |

**Appendix 1** to Stacey D, Lourdasamy A, Ruggeri B, et al. A translational systems biology approach in both animals and humans identifies a functionally related module of accumbal genes involved in the regulation of reward processing and binge drinking in males. *J Psychiatry Neurosci* 2015.

DOI: 10.1503/jpn.150138

*Online appendices are unedited and posted as supplied by the authors.*

|               |       |        |          |       |          |       |          |
|---------------|-------|--------|----------|-------|----------|-------|----------|
| Gpr19         | 0.81  | 11.99  | 1.24E-10 | 0.96  | 2.02E-10 | 62.33 | GPR19    |
| Mid1          | 1.61  | 17.27  | 1.50E-13 | 0.96  | 2.98E-10 | 62.82 | MID1     |
| A630064P09Rik | -0.46 | -10.17 | 2.20E-09 | -0.96 | 3.42E-10 | 59.67 |          |
| Ccl27         | -1.79 | -15.52 | 1.12E-12 | -0.96 | 4.35E-10 | 60.68 |          |
| 8430432M10Rik | 0.67  | 11.92  | 1.38E-10 | 0.95  | 1.13E-09 | 59.82 |          |
| Ndufb10       | 1.09  | 15.91  | 7.03E-13 | 0.95  | 1.74E-09 | 59.86 | NDUFB10  |
| Ube2i         | -1.04 | -12.22 | 8.89E-11 | -0.95 | 3.01E-09 | 56.05 | UBE2I    |
| Tubgcp4       | 0.62  | 10.28  | 1.82E-09 | 0.95  | 3.11E-09 | 55.84 | TUBGCP4  |
| Bub1b         | 0.36  | 8.56   | 3.79E-08 | 0.94  | 6.11E-09 | 53.49 | BUB1B    |
| Ehd4          | 0.67  | 9.79   | 4.19E-09 | 0.94  | 6.77E-09 | 54.66 | EHD4     |
| Rps2          | -0.51 | -10.47 | 1.33E-09 | -0.94 | 7.38E-09 | 53.67 | RPS2     |
| Arhgap12      | 1.12  | 11.84  | 1.57E-10 | 0.94  | 8.00E-09 | 53.33 | ARHGAP12 |
| Atm           | -0.54 | -9.67  | 5.10E-09 | -0.94 | 8.80E-09 | 52.53 | ATM      |
| Nubp2         | 0.69  | 9.87   | 3.67E-09 | 0.94  | 1.00E-08 | 53.57 | NUBP2    |
| Neol          | 0.61  | 9.99   | 2.99E-09 | 0.93  | 1.61E-08 | 51.98 | NEO1     |
| 6430553K24Rik | 0.36  | 7.66   | 2.15E-07 | 0.93  | 2.58E-08 | 51.24 |          |
| Clcn7         | -0.57 | -9.35  | 9.06E-09 | -0.93 | 2.83E-08 | 50.28 | CLCN7    |
| LOC100043919  | -1.44 | -10.29 | 1.80E-09 | -0.93 | 3.23E-08 | 49.33 |          |
| B830006A16Rik | -0.37 | -8.35  | 5.60E-08 | -0.93 | 3.30E-08 | 48.96 |          |
| EG434402      | 0.72  | 10.44  | 1.40E-09 | 0.92  | 5.00E-08 | 49.21 |          |
| Rnd3          | 0.89  | 9.15   | 1.28E-08 | 0.92  | 5.20E-08 | 48.74 | RND3     |
| Gins4         | 0.5   | 8.15   | 8.31E-08 | 0.92  | 6.18E-08 | 48.92 | GINS4    |
| Slc45a1       | -0.52 | -8.97  | 1.79E-08 | -0.92 | 6.38E-08 | 47.62 | SLC45A1  |
| Exoc6b        | 0.32  | 6.98   | 8.65E-07 | 0.92  | 6.79E-08 | 44.1  | EXOC6B   |
| Eif2ak2       | 0.65  | 8.68   | 3.03E-08 | 0.92  | 7.05E-08 | 47.23 | EIF2AK2  |
| Osbp11a       | 1.01  | 9.15   | 1.28E-08 | 0.92  | 7.46E-08 | 46.08 | OSBPL1A  |
| 2700017A04Rik | 0.54  | 8.3    | 6.24E-08 | 0.92  | 8.34E-08 | 42.87 |          |
| LOC329506     | 0.38  | 7.57   | 2.60E-07 | 0.92  | 1.03E-07 | 42.98 |          |
| LOC331139     | -0.64 | -8.79  | 2.49E-08 | -0.91 | 1.10E-07 | 42.81 |          |
| 0610010D24Rik | 0.27  | 6.7    | 1.53E-06 | 0.91  | 1.20E-07 | 45.64 |          |
| Dbpht2        | -1.36 | -9.09  | 1.42E-08 | -0.91 | 1.81E-07 | 45.51 | FLJ45079 |
| Anxa4         | -0.3  | -6.96  | 8.93E-07 | -0.91 | 2.21E-07 | 43.5  | ANXA4    |
| Alg9          | -0.4  | -8.31  | 6.04E-08 | -0.9  | 2.53E-07 | 44.68 | ALG9     |
| Ivd           | 0.45  | 7.51   | 2.93E-07 | 0.9   | 2.62E-07 | 38.97 | IVD      |
| Tatdn3        | -0.36 | -7.2   | 5.41E-07 | -0.9  | 2.72E-07 | 42.82 | TATDN3   |
| A930004K21Rik | 0.43  | 7.46   | 3.21E-07 | 0.9   | 2.83E-07 | 41.51 |          |
| 2310007O11Rik | 0.62  | 8.17   | 7.89E-08 | 0.9   | 3.23E-07 | 41.14 |          |
| Msh2          | 0.45  | 8.33   | 5.81E-08 | 0.9   | 3.69E-07 | 41.62 | MSH2     |
| Tsc2          | -0.67 | -8.43  | 4.81E-08 | -0.9  | 3.90E-07 | 41.37 | TSC2     |
| Chl1          | -1.18 | -8.53  | 4.02E-08 | -0.9  | 4.76E-07 | 41.8  | CHL1     |
| Eif4el3       | -0.57 | -8.43  | 4.81E-08 | -0.9  | 5.10E-07 | 39.08 |          |
| Gnptg         | -0.45 | -7.35  | 4.04E-07 | -0.89 | 5.73E-07 | 38.63 | GNPTG    |
| 3110021A11Rik | 0.44  | 7.03   | 7.73E-07 | 0.89  | 6.14E-07 | 36.91 |          |
| Pigf          | -0.25 | -6.02  | 6.74E-06 | -0.89 | 6.92E-07 | 38.72 | PIGF     |
| Rbbp9         | -0.88 | -9.4   | 8.19E-09 | -0.89 | 7.51E-07 | 40.43 | RBBP9    |
| Cml1          | 0.5   | 7.31   | 4.34E-07 | 0.89  | 7.67E-07 | 39.15 |          |
| Dhrsx         | -0.88 | -8.6   | 3.52E-08 | -0.89 | 7.88E-07 | 36.82 | DHRSX    |
| Abca8a        | 0.34  | 6.69   | 1.57E-06 | 0.89  | 8.36E-07 | 36.01 |          |

**Appendix 1** to Stacey D, Lourdasamy A, Ruggeri B, et al. A translational systems biology approach in both animals and humans identifies a functionally related module of accumbal genes involved in the regulation of reward processing and binge drinking in males. *J Psychiatry Neurosci* 2015.

DOI: 10.1503/jpn.150138

*Online appendices are unedited and posted as supplied by the authors.*

|                |       |       |          |       |          |       |          |
|----------------|-------|-------|----------|-------|----------|-------|----------|
| Psmb5          | -0.85 | -7.91 | 1.30E-07 | -0.89 | 8.51E-07 | 37.1  | PSMB5    |
| Mela           | -0.9  | -8.63 | 3.32E-08 | -0.88 | 1.13E-06 | 35.54 |          |
| Serpina3n      | -0.94 | -8.95 | 1.84E-08 | -0.88 | 1.21E-06 | 37.18 | SERPI3   |
| Stk25          | -1.1  | -7.6  | 2.43E-07 | -0.88 | 1.28E-06 | 34.54 | STK25    |
| Vps39          | -0.47 | -7.78 | 1.71E-07 | -0.88 | 1.29E-06 | 36.81 | VPS39    |
| LOC666621      | 0.16  | 3.99  | 7.16E-04 | 0.88  | 1.83E-06 | 32.33 |          |
| Itgb3bp        | 0.61  | 6.95  | 9.19E-07 | 0.88  | 1.89E-06 | 35.53 | ITGB3BP  |
| Serpina3h      | -0.58 | -8.15 | 8.30E-08 | -0.88 | 1.93E-06 | 34.07 |          |
| Rnase4         | 0.87  | 8.37  | 5.38E-08 | 0.87  | 2.13E-06 | 36.07 | RSE4     |
| AB041568       | 0.23  | 5.07  | 5.70E-05 | 0.87  | 3.07E-06 | 29.43 |          |
| Ugt1a10        | -0.3  | -5.96 | 7.71E-06 | -0.87 | 3.29E-06 | 31.41 |          |
| 2310045N01Rik  | 0.33  | 5.93  | 8.23E-06 | 0.86  | 4.10E-06 | 28.85 | MEF2BNB  |
| Prdm16         | 0.55  | 6.94  | 9.34E-07 | 0.86  | 4.12E-06 | 32.03 | PRDM16   |
| Supt16h        | -1.94 | -7.43 | 3.39E-07 | -0.86 | 4.50E-06 | 31.14 | SUPT16H  |
| Mertk          | -0.36 | -6.05 | 6.29E-06 | -0.86 | 4.52E-06 | 29.82 | MERTK    |
| Ang            | -0.45 | -6.72 | 1.48E-06 | -0.86 | 4.66E-06 | 29.48 | ANG      |
| Pgm2           | -0.26 | -5.71 | 1.34E-05 | -0.86 | 5.14E-06 | 28.79 | PGM1     |
| 1700047117Rik1 | 0.59  | 6.16  | 4.97E-06 | 0.85  | 6.21E-06 | 26.33 |          |
| Spata7         | 0.45  | 6.17  | 4.81E-06 | 0.85  | 6.38E-06 | 22.97 | SPATA7   |
| Snx5           | -0.33 | -5.88 | 9.05E-06 | -0.85 | 6.64E-06 | 29.48 | SNX5     |
| Ints7          | -0.33 | -5.97 | 7.50E-06 | -0.85 | 6.74E-06 | 29.03 | INTS7    |
| Ajap1          | -0.4  | -6.42 | 2.79E-06 | -0.85 | 7.16E-06 | 28.49 | AJAP1    |
| Catsper2       | -0.25 | -5.22 | 4.01E-05 | -0.85 | 7.32E-06 | 26.81 | CATSPER2 |
| Bid            | 0.38  | 5.95  | 7.86E-06 | 0.85  | 8.20E-06 | 26.65 | BID      |
| Exdl1          | -0.22 | -5.05 | 5.95E-05 | -0.85 | 8.53E-06 | 26.02 |          |
| Pgpep1         | 0.45  | 6     | 6.94E-06 | 0.85  | 9.40E-06 | 29.74 | PGPEP1   |
| H2afv          | -0.89 | -6.88 | 1.06E-06 | -0.85 | 9.45E-06 | 25.84 | H2AFV    |
| 8030462N17Rik  | -0.32 | -5.85 | 9.74E-06 | -0.85 | 9.72E-06 | 28.92 | C18orf25 |
| Zfp706         | 0.37  | 6.12  | 5.37E-06 | 0.85  | 9.98E-06 | 27.53 | ZNF706   |
| Rfesd          | -0.29 | -5.63 | 1.60E-05 | -0.84 | 1.11E-05 | 26.48 | RFESD    |
| D330027H18Rik  | 1.16  | 6.62  | 1.85E-06 | 0.84  | 1.14E-05 | 24.51 |          |
| LOC100048331   | -0.43 | -6.33 | 3.38E-06 | -0.84 | 1.16E-05 | 27.19 |          |
| Rpp25          | -0.51 | -6.7  | 1.55E-06 | -0.84 | 1.23E-05 | 27.53 | RPP25    |
| Evpl           | 0.38  | 5.71  | 1.33E-05 | 0.84  | 1.33E-05 | 25.81 | EVPL     |
| LOC100046129   | 0.36  | 5.81  | 1.07E-05 | 0.84  | 1.39E-05 | 24.04 |          |
| Ppp1r3f        | 0.38  | 6.08  | 5.92E-06 | 0.84  | 1.48E-05 | 27.1  | PPP1R3F  |
| LOC667034      | -0.49 | -5.96 | 7.64E-06 | -0.84 | 1.58E-05 | 22.82 |          |
| Dapk1          | -0.3  | -5.04 | 6.08E-05 | -0.84 | 1.60E-05 | 24.45 | DAPK1    |
| 2410004L22Rik  | 0.41  | 5.74  | 1.26E-05 | 0.84  | 1.61E-05 | 25.69 |          |
| Dcp1b          | 0.58  | 6.24  | 4.13E-06 | 0.83  | 1.78E-05 | 28.68 | DCP1B    |
| Dguok          | 0.38  | 5.55  | 1.91E-05 | 0.83  | 1.99E-05 | 26.55 | DGUOK    |
| Itfg2          | 0.63  | 6.54  | 2.15E-06 | 0.83  | 2.07E-05 | 27    | ITFG2    |
| Cryab          | -0.7  | -6.16 | 4.97E-06 | -0.83 | 2.17E-05 | 25.62 | CRYAB    |
| Hnrpc          | 0.29  | 4.82  | 1.02E-04 | 0.83  | 2.21E-05 | 24.65 |          |
| Gpr68          | 0.33  | 5.12  | 5.06E-05 | 0.83  | 2.22E-05 | 26.1  | GPR68    |
| Map4k5         | 0.23  | 4.63  | 1.57E-04 | 0.83  | 2.25E-05 | 24.66 | MAP4K5   |
| Gm288          | 0.3   | 5.45  | 2.39E-05 | 0.82  | 2.62E-05 | 24.26 |          |
| Snpc3          | 0.38  | 5.43  | 2.53E-05 | 0.82  | 2.75E-05 | 22.87 | SPC3     |

**Appendix 1** to Stacey D, Lourdasamy A, Ruggeri B, et al. A translational systems biology approach in both animals and humans identifies a functionally related module of accumbal genes involved in the regulation of reward processing and binge drinking in males. *J Psychiatry Neurosci* 2015.

DOI: 10.1503/jpn.150138

*Online appendices are unedited and posted as supplied by the authors.*

|                   |       |       |          |       |          |       |            |
|-------------------|-------|-------|----------|-------|----------|-------|------------|
| C130002N06        | 0.35  | 5.14  | 4.90E-05 | 0.82  | 2.77E-05 | 24.87 |            |
| Prkd3             | 0.64  | 6.2   | 4.54E-06 | 0.82  | 2.89E-05 | 24.04 | PRKD3      |
| Esco1             | -0.17 | -3.95 | 7.78E-04 | -0.82 | 3.02E-05 | 21.06 | ESCO1      |
| Thtpa             | 0.24  | 4.83  | 9.85E-05 | 0.82  | 3.23E-05 | 21.24 | THTPA      |
| Alg6              | -0.44 | -5.94 | 7.96E-06 | -0.82 | 3.42E-05 | 20.05 | ALG6       |
| A130082M07Rik     | 0.41  | 5.19  | 4.39E-05 | 0.82  | 3.51E-05 | 24.53 |            |
| Cdc21l            | -0.34 | -5.38 | 2.80E-05 | -0.82 | 3.59E-05 | 21.66 |            |
| Pts               | -0.62 | -6.47 | 2.49E-06 | -0.82 | 3.60E-05 | 24.97 | PTS        |
| Snapc1            | 0.42  | 5.22  | 4.08E-05 | 0.81  | 4.12E-05 | 24.82 | SPC1       |
| LOC218206         | 0.25  | 5.11  | 5.16E-05 | 0.81  | 4.14E-05 | 21.87 |            |
| Bcdo2             | -0.21 | -4.48 | 2.23E-04 | -0.81 | 4.41E-05 | 21.03 |            |
| Shhrs             | -0.15 | -3.67 | 1.51E-03 | -0.81 | 4.85E-05 | 19.39 |            |
| Polr3k            | 0.28  | 4.67  | 1.44E-04 | 0.81  | 4.94E-05 | 21.66 | POLR3K     |
| Kcnu1             | -0.29 | -4.8  | 1.07E-04 | -0.81 | 5.07E-05 | 19.84 | KCNU1      |
| Abca3             | 0.39  | 5.18  | 4.48E-05 | 0.81  | 5.13E-05 | 22.66 | ABCA3      |
| Chd8              | 0.26  | 4.93  | 7.98E-05 | 0.81  | 5.26E-05 | 20.66 | CHD8       |
| 4930570C03Rik     | -0.5  | -5.89 | 8.89E-06 | -0.81 | 5.49E-05 | 21.96 |            |
| Gadd45gip1        | -0.25 | -4.9  | 8.49E-05 | -0.8  | 5.83E-05 | 19.85 | GADD45GIP1 |
| Plcb2             | 0.17  | 3.94  | 7.94E-04 | 0.8   | 6.68E-05 | 18.68 | PLCB2      |
| Cdh15             | 0.78  | 5.92  | 8.43E-06 | 0.79  | 8.67E-05 | 18.16 | CDH15      |
| Rpl21             | 0.22  | 4.4   | 2.69E-04 | 0.79  | 8.86E-05 | 17.93 | RPL21      |
| ENSMUSG0000043795 | -0.21 | -4.5  | 2.14E-04 | -0.79 | 9.41E-05 | 18.79 |            |
| Dio2              | 0.26  | 4.45  | 2.44E-04 | 0.79  | 9.67E-05 | 16.6  | DIO2       |
| Emp2              | 0.44  | 4.88  | 8.81E-05 | 0.79  | 9.71E-05 | 18.76 | EMP2       |
| Lypd6b            | 0.39  | 4.87  | 9.12E-05 | 0.79  | 9.78E-05 | 14.14 | LYPD6B     |
| Zmat5             | -0.32 | -4.67 | 1.43E-04 | -0.79 | 1.00E-04 | 17.46 | ZMAT5      |
| LOC100040525      | 0.65  | 5.73  | 1.28E-05 | 0.79  | 1.01E-04 | 18.85 |            |
| 2410076I21Rik     | 0.26  | 4.52  | 2.07E-04 | 0.79  | 1.03E-04 | 19.23 | C15orf60   |
| Nfam1             | 0.16  | 3.7   | 1.42E-03 | 0.79  | 1.03E-04 | 17.72 | NFAM1      |
| Sfrp1             | 0.39  | 5.08  | 5.60E-05 | 0.79  | 1.09E-04 | 16.88 | SFRP1      |
| LOC100046232      | 0.22  | 4.12  | 5.19E-04 | 0.79  | 1.13E-04 | 17.08 |            |
| Dbnl              | 0.31  | 4.63  | 1.60E-04 | 0.78  | 1.21E-04 | 14.47 | DBNL       |
| BC030867          | 0.16  | 3.74  | 1.27E-03 | 0.78  | 1.21E-04 | 15.77 | C17orf53   |
| Rbm28             | 0.66  | 5.89  | 8.86E-06 | 0.78  | 1.24E-04 | 16.79 | RBM28      |
| LOC386486         | 0.47  | 5.49  | 2.20E-05 | 0.78  | 1.28E-04 | 19.13 |            |
| Lsm8              | -0.27 | -4.49 | 2.18E-04 | -0.78 | 1.28E-04 | 16.42 |            |
| Ndrp2             | -0.59 | -5.51 | 2.11E-05 | -0.78 | 1.29E-04 | 17.55 | NDRG2      |
| Fkbp11            | 0.38  | 5.03  | 6.21E-05 | 0.78  | 1.29E-04 | 18.07 | FKBP11     |
| Lpcat2            | 0.22  | 4.21  | 4.26E-04 | 0.78  | 1.29E-04 | 14.88 | LPCAT2     |
| 2900016B01Rik     | -0.26 | -4.21 | 4.21E-04 | -0.78 | 1.38E-04 | 17.49 |            |
| Pygb              | -0.75 | -5.31 | 3.29E-05 | -0.78 | 1.43E-04 | 13.34 | PYGB       |
| Ubfd1             | 0.26  | 4.34  | 3.12E-04 | 0.78  | 1.45E-04 | 14.72 | UBFD1      |
| Jdp2              | 0.19  | 3.89  | 8.93E-04 | 0.78  | 1.45E-04 | 15.42 | JDP2       |
| Rusc1             | 0.22  | 4.25  | 3.85E-04 | 0.78  | 1.46E-04 | 16.12 | RUSC1      |
| Nuded3            | 0.16  | 3.43  | 2.62E-03 | 0.78  | 1.46E-04 | 13.61 | NUDCD3     |
| Tnks              | -0.13 | -3.12 | 5.36E-03 | -0.78 | 1.46E-04 | 13.39 | TNKS       |
| Col4a3bp          | -0.17 | -3.85 | 9.78E-04 | -0.78 | 1.54E-04 | 16.61 | COL4A3BP   |

**Appendix 1** to Stacey D, Lourdasamy A, Ruggeri B, et al. A translational systems biology approach in both animals and humans identifies a functionally related module of accumbal genes involved in the regulation of reward processing and binge drinking in males. *J Psychiatry Neurosci* 2015.

DOI: 10.1503/jpn.150138

*Online appendices are unedited and posted as supplied by the authors.*

|               |       |       |          |       |          |       |          |
|---------------|-------|-------|----------|-------|----------|-------|----------|
| Tmem59l       | 0.45  | 5.28  | 3.57E-05 | 0.78  | 1.56E-04 | 16.64 | TMEM59L  |
| EG232599      | 0.3   | 4.45  | 2.43E-04 | 0.78  | 1.56E-04 | 19.15 |          |
| Ocell1        | -0.75 | -5.16 | 4.68E-05 | -0.78 | 1.58E-04 | 19.79 | OCEL1    |
| 4933431K14Rik | 0.22  | 4.3   | 3.43E-04 | 0.78  | 1.58E-04 | 15.48 |          |
| Kctd5         | 0.19  | 3.91  | 8.54E-04 | 0.77  | 1.62E-04 | 15.45 | KCTD5    |
| Zcchc3        | -0.58 | -4.92 | 8.03E-05 | -0.77 | 1.64E-04 | 14.62 | ZCCHC3   |
| 2410026K10Rik | 0.27  | 4.82  | 1.01E-04 | 0.77  | 1.64E-04 | 17.34 |          |
| Coq9          | 0.3   | 4.58  | 1.78E-04 | 0.77  | 1.66E-04 | 14.78 | COQ9     |
| 9.33E+12      | 0.17  | 3.84  | 1.02E-03 | 0.77  | 1.67E-04 | 16.42 |          |
| Thap4         | -0.92 | -5.62 | 1.64E-05 | -0.77 | 1.72E-04 | 18.09 | THAP4    |
| A330029H11Rik | -0.19 | -3.94 | 7.94E-04 | -0.77 | 1.92E-04 | 15.59 |          |
| Clec16a       | -0.5  | -4.8  | 1.06E-04 | -0.77 | 1.98E-04 | 16.02 | CLEC16A  |
| McpH1         | 0.14  | 3.23  | 4.20E-03 | 0.77  | 1.99E-04 | 15.6  | MCPH1    |
| 6330583M11Rik | -0.33 | -4.62 | 1.63E-04 | -0.77 | 2.04E-04 | 15.56 |          |
| 3010022N24Rik | 0.64  | 5.61  | 1.66E-05 | 0.77  | 2.08E-04 | 16.57 |          |
| Klcl          | 0.78  | 5     | 6.71E-05 | 0.77  | 2.08E-04 | 17.05 | KLC1     |
| Hebpl         | -0.32 | -4.42 | 2.60E-04 | -0.77 | 2.11E-04 | 13.81 | HEBP1    |
| Pkm2          | -0.37 | -4.41 | 2.67E-04 | -0.77 | 2.11E-04 | 15.2  |          |
| 1500012F01Rik | 0.33  | 4.95  | 7.63E-05 | 0.76  | 2.17E-04 | 16.76 |          |
| B2m           | 0.35  | 4.69  | 1.39E-04 | 0.76  | 2.25E-04 | 13.55 | B2M      |
| Ganc          | -0.42 | -4.47 | 2.32E-04 | -0.75 | 2.93E-04 | 14.05 | GANC     |
| Prdx2         | 1.27  | 5.24  | 3.83E-05 | 0.75  | 2.99E-04 | 13.95 | PRDX2    |
| Galt          | -0.31 | -4.55 | 1.91E-04 | -0.75 | 3.00E-04 | 12.6  | GALT     |
| Rnase6        | -0.24 | -4.25 | 3.83E-04 | -0.75 | 3.21E-04 | 12.77 | RSE6     |
| Tmco5         | 0.18  | 3.56  | 1.96E-03 | 0.75  | 3.23E-04 | 12.89 | TMCO5A   |
| Rhoq          | -0.22 | -4.08 | 5.71E-04 | -0.75 | 3.32E-04 | 14.62 | RHOQ     |
| Spsb3         | -0.38 | -4.82 | 1.03E-04 | -0.75 | 3.36E-04 | 13.66 | SPSB3    |
| 4732469G06Rik | -0.2  | -4    | 6.99E-04 | -0.75 | 3.41E-04 | 12.39 |          |
| 2310047M10Rik | 0.27  | 4.41  | 2.63E-04 | 0.75  | 3.66E-04 | 12.97 | C17orf59 |
| Slc5a5        | 1.23  | 4.74  | 1.22E-04 | 0.74  | 4.31E-04 | 14.19 | SLC5A5   |
| LOC100048384  | 0.25  | 4.35  | 3.06E-04 | 0.74  | 4.33E-04 | 14.21 |          |
| Kns2          | 1.28  | 4.61  | 1.65E-04 | 0.74  | 4.36E-04 | 15.72 |          |
| 5730405I09Rik | 0.37  | 4.21  | 4.25E-04 | 0.74  | 4.52E-04 | 11.08 |          |
| Usp2          | -0.41 | -4.1  | 5.43E-04 | -0.74 | 4.65E-04 | 14.19 | USP2     |
| Tmem22        | 0.39  | 4.3   | 3.47E-04 | 0.74  | 4.67E-04 | 12.88 | SLC35G2  |
| 6330562C20Rik | 0.21  | 3.76  | 1.22E-03 | 0.74  | 4.86E-04 | 11.72 |          |
| E030045B01Rik | -0.26 | -4.03 | 6.43E-04 | -0.74 | 4.96E-04 | 12.59 |          |
| Spsb1         | 0.27  | 4.07  | 5.88E-04 | 0.74  | 4.98E-04 | 12.05 | SPSB1    |
| Gtpbp3        | -0.26 | -4.13 | 5.09E-04 | -0.74 | 5.01E-04 | 11.06 | GTPBP3   |
| 6430561B16Rik | -0.12 | -2.95 | 7.84E-03 | -0.73 | 5.18E-04 | 11.27 |          |
| Ncan          | -0.36 | -4.4  | 2.70E-04 | -0.73 | 5.22E-04 | 13.94 | NCAN     |
| AU019823      | 0.19  | 3.62  | 1.68E-03 | 0.73  | 5.32E-04 | 11.39 | C11orf57 |
| Zfp609        | 0.14  | 3.17  | 4.80E-03 | 0.73  | 5.38E-04 | 10.5  | ZNF609   |
| Btbd6         | 0.34  | 4.02  | 6.68E-04 | 0.73  | 5.74E-04 | 14.16 | BTBD6    |
| Pcdhb7        | -0.24 | -3.86 | 9.63E-04 | -0.73 | 5.90E-04 | 11.13 |          |
| Ccl9          | -0.35 | -4.47 | 2.32E-04 | -0.73 | 5.93E-04 | 11.86 |          |
| Igf2r         | 0.15  | 3.39  | 2.91E-03 | 0.73  | 6.01E-04 | 11.58 | IGF2R    |
| Gpr176        | 0.32  | 3.91  | 8.61E-04 | 0.73  | 6.12E-04 | 13.42 | GPR176   |

**Appendix 1** to Stacey D, Lourdasamy A, Ruggeri B, et al. A translational systems biology approach in both animals and humans identifies a functionally related module of accumbal genes involved in the regulation of reward processing and binge drinking in males. *J Psychiatry Neurosci* 2015.

DOI: 10.1503/jpn.150138

*Online appendices are unedited and posted as supplied by the authors.*

|               |       |       |          |       |          |       |          |
|---------------|-------|-------|----------|-------|----------|-------|----------|
| Sh3glb1       | -0.18 | -3.63 | 1.65E-03 | -0.73 | 6.15E-04 | 11.04 | SH3GLB1  |
| LOC224532     | 0.32  | 4.29  | 3.53E-04 | 0.73  | 6.31E-04 | 13.02 |          |
| Slc9a3r2      | 0.23  | 3.93  | 8.23E-04 | 0.72  | 6.66E-04 | 9.14  | SLC9A3R2 |
| Wnt2          | 0.64  | 4.37  | 2.90E-04 | 0.72  | 6.70E-04 | 10.65 | WNT2     |
| Rasl12        | 0.27  | 4.01  | 6.78E-04 | 0.72  | 6.91E-04 | 10.36 | RASL12   |
| Pelo          | 0.26  | 3.92  | 8.35E-04 | 0.72  | 6.99E-04 | 9.76  | PELO     |
| Agpat5        | -0.59 | -4.6  | 1.69E-04 | -0.72 | 7.05E-04 | 10.53 | AGPAT5   |
| Ppp1r3e       | -0.13 | -2.98 | 7.39E-03 | -0.72 | 7.17E-04 | 10.17 | PPP1R3E  |
| Xkr8          | 0.35  | 4.52  | 2.04E-04 | 0.72  | 7.30E-04 | 10.18 | XKR8     |
| LOC100045567  | 0.38  | 4.16  | 4.81E-04 | 0.72  | 7.49E-04 | 9.76  |          |
| Fancc         | 0.18  | 3.55  | 1.99E-03 | 0.72  | 7.62E-04 | 11.45 | FANCC    |
| Ccdc124       | 0.49  | 4.47  | 2.29E-04 | 0.72  | 7.71E-04 | 11.69 | CCDC124  |
| Slc39a2       | -0.41 | -4.05 | 6.13E-04 | -0.72 | 7.71E-04 | 10.01 | SLC39A2  |
| Rtbdn         | 0.18  | 3.54  | 2.05E-03 | 0.72  | 7.77E-04 | 9.67  | RTBDN    |
| Dci           | -0.28 | -4.14 | 4.98E-04 | -0.72 | 7.79E-04 | 10.03 |          |
| Pkd2l1        | -0.57 | -4.48 | 2.28E-04 | -0.72 | 7.97E-04 | 10.27 | PKD2L1   |
| Uncx          | 0.14  | 3.15  | 5.00E-03 | 0.72  | 8.50E-04 | 8.95  | UNCX     |
| Ccdc66        | -0.11 | -2.69 | 1.40E-02 | -0.71 | 8.82E-04 | 9.29  | CCDC66   |
| D330040L23Rik | -0.19 | -3.47 | 2.39E-03 | -0.71 | 9.47E-04 | 8.17  |          |
| D8Ert82e      | 0.24  | 3.71  | 1.38E-03 | 0.71  | 9.96E-04 | 10    | SGK223   |
| 4833418A01Rik | -0.16 | -3.29 | 3.61E-03 | -0.71 | 1.01E-03 | 7.21  |          |
| EG623661      | 0.13  | 3.07  | 5.97E-03 | 0.71  | 1.03E-03 | 10.26 |          |
| Dscr3         | 0.16  | 3.22  | 4.30E-03 | 0.71  | 1.04E-03 | 7.4   | DSCR3    |
| AU021838      | 0.21  | 3.56  | 1.95E-03 | 0.71  | 1.05E-03 | 10.26 |          |
| A930017G19Rik | 0.14  | 2.97  | 7.49E-03 | 0.71  | 1.05E-03 | 8.12  |          |
| AU014645      | -0.16 | -3.31 | 3.44E-03 | -0.71 | 1.07E-03 | 8.99  |          |
| Xpnpep1       | -0.29 | -4.16 | 4.79E-04 | -0.7  | 1.09E-03 | 10.88 | XPNPEP1  |
| Trfp          | 0.24  | 3.63  | 1.67E-03 | 0.7   | 1.10E-03 | 10.9  |          |
| C730046C01Rik | -0.19 | -3.4  | 2.80E-03 | -0.7  | 1.12E-03 | 10.26 |          |
| Xpa           | -0.3  | -3.98 | 7.30E-04 | -0.7  | 1.14E-03 | 9.56  | XPA      |
| Dgkq          | 0.28  | 4.07  | 5.83E-04 | 0.7   | 1.23E-03 | 10.14 | DGKQ     |
| Stmn1         | 0.29  | 3.67  | 1.52E-03 | 0.7   | 1.24E-03 | 6.85  | STMN1    |
| Plvap         | -0.52 | -4.11 | 5.39E-04 | -0.7  | 1.28E-03 | 10.55 | PLVAP    |
| Atg16l1       | -0.24 | -3.74 | 1.29E-03 | -0.7  | 1.29E-03 | 10.14 | ATG16L1  |
| Fam122b       | 0.15  | 3.04  | 6.44E-03 | 0.7   | 1.29E-03 | 8.06  | FAM122B  |
| Pycrl         | 0.19  | 3.71  | 1.37E-03 | 0.7   | 1.31E-03 | 10.39 | PYCRL    |
| Nin           | -0.31 | -3.82 | 1.05E-03 | -0.7  | 1.33E-03 | 8.55  | NIN      |
| Upp1          | 0.28  | 3.94  | 8.04E-04 | 0.69  | 1.39E-03 | 8.57  | UPP1     |
| Ogfrl1        | -0.73 | -3.89 | 8.97E-04 | -0.69 | 1.47E-03 | 9.3   | OGFRL1   |
| Ntn2l         | 0.22  | 3.64  | 1.60E-03 | 0.69  | 1.51E-03 | 8.76  |          |
| Ppp1r13b      | 0.41  | 4     | 6.99E-04 | 0.69  | 1.55E-03 | 9.81  | PPP1R13B |
| Flnc          | 0.13  | 2.86  | 9.55E-03 | 0.69  | 1.61E-03 | 7.67  | FLNC     |
| Ap1g2         | 0.28  | 3.48  | 2.31E-03 | 0.69  | 1.63E-03 | 7.85  | APIG2    |
| A1256775      | -0.26 | -3.87 | 9.51E-04 | -0.69 | 1.67E-03 | 8.16  |          |
| L3mbtl2       | -0.15 | -3.19 | 4.61E-03 | -0.69 | 1.69E-03 | 7.99  | L3MBTL2  |
| Fgl1          | -0.25 | -3.63 | 1.63E-03 | -0.68 | 1.76E-03 | 7.77  | FGL1     |
| Pdk4          | -0.36 | -3.96 | 7.61E-04 | -0.68 | 1.80E-03 | 6.77  | PDK4     |
| Brunol6       | 0.34  | 3.99  | 7.06E-04 | 0.68  | 1.81E-03 | 8.77  |          |



**Appendix 1** to Stacey D, Lourdasamy A, Ruggeri B, et al. A translational systems biology approach in both animals and humans identifies a functionally related module of accumbal genes involved in the regulation of reward processing and binge drinking in males. *J Psychiatry Neurosci* 2015.

DOI: 10.1503/jpn.150138

*Online appendices are unedited and posted as supplied by the authors.*

|               |       |       |          |       |          |      |          |
|---------------|-------|-------|----------|-------|----------|------|----------|
| Adhfe1        | 0.12  | 2.76  | 1.20E-02 | 0.68  | 1.82E-03 | 7.8  | ADHFE1   |
| LOC381596     | -0.11 | -2.58 | 1.79E-02 | -0.68 | 1.86E-03 | 5.59 |          |
| Trappc6b      | 0.43  | 3.73  | 1.31E-03 | 0.68  | 1.89E-03 | 7.2  | TRAPPC6B |
| 4930563F16Rik | -0.13 | -2.93 | 8.32E-03 | -0.68 | 1.92E-03 | 7.46 |          |
| Gng10         | -0.22 | -3.35 | 3.14E-03 | -0.68 | 1.99E-03 | 5.98 | GNG10    |
| 2410006H16Rik | 0.21  | 3.39  | 2.87E-03 | 0.68  | 2.02E-03 | 8.11 |          |
| Sytl4         | 0.68  | 3.74  | 1.27E-03 | 0.68  | 2.05E-03 | 7.79 | SYTL4    |
| Mt2           | -0.25 | -3.86 | 9.75E-04 | -0.68 | 2.09E-03 | 7.27 | MT2A     |
| Rpap3         | -0.26 | -3.84 | 1.01E-03 | -0.67 | 2.15E-03 | 9.13 | RPAP3    |
| Mrpl9         | 0.31  | 3.7   | 1.42E-03 | 0.67  | 2.15E-03 | 7.65 | MRPL9    |
| LOC100044294  | -0.23 | -3.42 | 2.68E-03 | -0.67 | 2.17E-03 | 7.31 |          |
| Zbtb46        | 0.12  | 2.61  | 1.67E-02 | 0.67  | 2.17E-03 | 8.44 | ZBTB46   |
| Ifrd2         | -0.12 | -2.69 | 1.39E-02 | -0.67 | 2.32E-03 | 6.32 | IFRD2    |
| Pbx4          | 0.24  | 3.45  | 2.51E-03 | 0.67  | 2.43E-03 | 5.86 | PBX4     |
| 2810402K13Rik | 0.14  | 2.86  | 9.72E-03 | 0.66  | 2.65E-03 | 5.77 |          |
| Nola2         | -0.29 | -3.78 | 1.17E-03 | -0.66 | 2.69E-03 | 6.54 |          |
| 2810422J05Rik | 0.15  | 2.92  | 8.44E-03 | 0.66  | 2.70E-03 | 7.52 |          |
| Capn3         | 0.17  | 3.11  | 5.53E-03 | 0.66  | 2.72E-03 | 6.21 | CAPN3    |
| B230396K19Rik | -0.11 | -2.45 | 2.36E-02 | -0.66 | 2.78E-03 | 6.49 |          |
| Erdr1         | -0.81 | -3.48 | 2.32E-03 | -0.66 | 2.97E-03 | 6.57 |          |
| C230078M08Rik | -0.3  | -3.61 | 1.75E-03 | -0.66 | 3.01E-03 | 5.91 |          |
| Dnajc2        | -0.23 | -3.3  | 3.53E-03 | -0.66 | 3.02E-03 | 6.79 | DJC2     |
| Pawr          | 0.12  | 2.63  | 1.59E-02 | 0.66  | 3.04E-03 | 6.1  | PAWR     |
| LOC330052     | 0.13  | 2.72  | 1.32E-02 | 0.66  | 3.06E-03 | 4.42 |          |
| C630016C03Rik | 0.17  | 3.02  | 6.72E-03 | 0.65  | 3.22E-03 | 6    |          |
| LOC381420     | 0.12  | 2.67  | 1.46E-02 | 0.65  | 3.31E-03 | 5.76 |          |
| D8Erd738e     | -0.21 | -3.32 | 3.37E-03 | -0.65 | 3.37E-03 | 5.83 | C19orf53 |
| Adamtsl2      | 0.19  | 3.2   | 4.51E-03 | 0.65  | 3.38E-03 | 4.48 | ADAMTSL2 |
| EG668831      | 0.15  | 2.83  | 1.04E-02 | 0.65  | 3.45E-03 | 6.69 |          |
| AI316807      | -0.24 | -3.48 | 2.35E-03 | -0.65 | 3.63E-03 | 5.92 | C8orf40  |
| Bcl2l2        | 0.11  | 2.48  | 2.19E-02 | 0.65  | 3.73E-03 | 5.53 | BCL2L2   |
| Sdccag33l     | 0.25  | 3.3   | 3.59E-03 | 0.65  | 3.80E-03 | 5.96 |          |
| Abhd4         | -0.32 | -3.51 | 2.18E-03 | -0.64 | 4.00E-03 | 6.31 | ABHD4    |
| Fos           | 0.52  | 3.63  | 1.65E-03 | 0.64  | 4.06E-03 | 4.46 | FOS      |
| 6330500D04Rik | -0.39 | -3.54 | 2.02E-03 | -0.64 | 4.11E-03 | 6.68 |          |
| Rps4y2        | 0.35  | 3.37  | 3.03E-03 | 0.64  | 4.16E-03 | 4.83 |          |
| Phf13         | 0.15  | 2.79  | 1.13E-02 | 0.64  | 4.40E-03 | 4.2  | PHF13    |
| 1110003P22Rik | 0.15  | 2.91  | 8.69E-03 | 0.64  | 4.47E-03 | 5.17 |          |
| Zswim4        | 0.13  | 2.66  | 1.49E-02 | 0.64  | 4.57E-03 | 5.21 | ZSWIM4   |
| Eif3s1        | -0.17 | -3.02 | 6.66E-03 | -0.63 | 4.77E-03 | 4.17 |          |
| LOC384104     | -0.19 | -3.19 | 4.59E-03 | -0.63 | 4.84E-03 | 5.19 |          |
| mt-Nd4        | -0.26 | -3.18 | 4.71E-03 | -0.63 | 5.13E-03 | 5.05 | ND4      |
| Ccl17         | 0.35  | 3.22  | 4.22E-03 | 0.63  | 5.23E-03 | 4.84 | CCL17    |
| Zfp709        | 0.1   | 2.32  | 3.09E-02 | 0.63  | 5.24E-03 | 4.62 | ZNF14    |
| Ift122        | 0.15  | 2.84  | 1.01E-02 | 0.63  | 5.28E-03 | 5.53 | IFT122   |
| A830093I24Rik | 0.11  | 2.47  | 2.24E-02 | 0.63  | 5.43E-03 | 5.6  |          |
| Pcm1          | -0.19 | -3.06 | 6.09E-03 | -0.62 | 5.83E-03 | 5    | PCM1     |
| Pou6f1        | -1.15 | -3.65 | 1.57E-03 | -0.62 | 5.91E-03 | 4.05 | POU6F1   |

**Appendix 1** to Stacey D, Lourdasamy A, Ruggeri B, et al. A translational systems biology approach in both animals and humans identifies a functionally related module of accumbal genes involved in the regulation of reward processing and binge drinking in males. *J Psychiatry Neurosci* 2015.

DOI: 10.1503/jpn.150138

*Online appendices are unedited and posted as supplied by the authors.*

|               |       |       |          |       |          |      |          |
|---------------|-------|-------|----------|-------|----------|------|----------|
| LOC100041567  | 0.42  | 3.53  | 2.08E-03 | 0.62  | 6.01E-03 | 4.74 |          |
| Mrps7         | 0.18  | 2.95  | 7.87E-03 | 0.62  | 6.06E-03 | 5.59 | MRPS7    |
| Slc35f3       | -0.19 | -2.87 | 9.48E-03 | -0.62 | 6.34E-03 | 4.72 | SLC35F3  |
| Tulp3         | -0.11 | -2.41 | 2.56E-02 | -0.62 | 6.43E-03 | 4.19 | TULP3    |
| Spns1         | 0.16  | 2.91  | 8.68E-03 | 0.61  | 6.79E-03 | 3.73 | SPNS1    |
| Sdf2l1        | 0.15  | 2.73  | 1.28E-02 | 0.61  | 7.41E-03 | 3.59 | SDF2L1   |
| Diap3         | 0.18  | 3.09  | 5.76E-03 | 0.61  | 7.46E-03 | 4.31 | DIAPH3   |
| 2310005E10Rik | 0.15  | 2.72  | 1.32E-02 | 0.61  | 7.49E-03 | 5.14 |          |
| Socs2         | -0.21 | -2.96 | 7.67E-03 | -0.61 | 7.64E-03 | 3.85 | SOCS2    |
| Tra2a         | 0.3   | 3.39  | 2.88E-03 | 0.6   | 8.27E-03 | 4.41 | TRA2A    |
| Bmx           | 0.12  | 2.5   | 2.13E-02 | 0.6   | 8.95E-03 | 3.71 | BMX      |
| Nicn1         | 0.18  | 2.62  | 1.62E-02 | 0.59  | 1.04E-02 | 4.05 | NICN1    |
| Cog3          | -0.13 | -2.5  | 2.13E-02 | -0.59 | 1.04E-02 | 3.24 | COG3     |
| LOC385792     | 0.12  | 2.43  | 2.46E-02 | 0.59  | 1.05E-02 | 3.36 |          |
| 2410075B13Rik | 0.1   | 2.16  | 4.30E-02 | 0.59  | 1.06E-02 | 3.06 |          |
| Zfp593        | 0.15  | 2.64  | 1.58E-02 | 0.58  | 1.25E-02 | 3.31 | ZNF593   |
| Dhps          | 0.11  | 2.26  | 3.53E-02 | 0.57  | 1.28E-02 | 2.56 | DHPS     |
| Fabp6         | 0.11  | 2.26  | 3.52E-02 | 0.57  | 1.42E-02 | 2.73 | FABP6    |
| Fam171b       | -0.17 | -2.54 | 1.92E-02 | -0.56 | 1.54E-02 | 3.51 | FAM171B  |
| Tpmt          | -0.15 | -2.72 | 1.32E-02 | -0.56 | 1.66E-02 | 2.45 | TPMT     |
| Mat2b         | 0.21  | 2.86  | 9.54E-03 | 0.55  | 1.70E-02 | 3.35 | MAT2B    |
| Akr1e1        | 0.27  | 3.06  | 6.10E-03 | 0.55  | 1.73E-02 | 1.94 | AKR1E2   |
| LOC383579     | 0.12  | 2.22  | 3.80E-02 | 0.55  | 1.78E-02 | 2.23 |          |
| Zbtb43        | -0.12 | -2.11 | 4.80E-02 | -0.55 | 1.87E-02 | 2.98 | ZBTB43   |
| Tcerg1        | -0.16 | -2.54 | 1.96E-02 | -0.54 | 1.97E-02 | 2.09 | TCERG1   |
| Nt5dc2        | -0.12 | -2.3  | 3.25E-02 | -0.54 | 1.97E-02 | 2.05 | NT5DC2   |
| Coq3          | 0.14  | 2.37  | 2.78E-02 | 0.54  | 2.01E-02 | 2.15 | COQ3     |
| Ankrd35       | 0.1   | 2     | 5.94E-02 | 0.54  | 2.01E-02 | 2.72 | ANKRD35  |
| 1110038F14Rik | -0.17 | -2.38 | 2.75E-02 | -0.54 | 2.13E-02 | 2.11 | C8orf33  |
| Nupr1         | -0.26 | -2.66 | 1.51E-02 | -0.53 | 2.25E-02 | 2.43 | NUPR1    |
| LOC100039175  | -0.1  | -2.17 | 4.22E-02 | -0.53 | 2.34E-02 | 1.64 |          |
| AI837181      | 0.15  | 2.27  | 3.44E-02 | 0.53  | 2.42E-02 | 1.79 | C11orf68 |
| Rbbp5         | 0.12  | 2.18  | 4.11E-02 | 0.52  | 2.58E-02 | 2.83 | RBBP5    |
| Birc5         | 0.09  | 2.02  | 5.73E-02 | 0.52  | 2.69E-02 | 1.6  | BIRC5    |
| Cd97          | 0.11  | 2.15  | 4.41E-02 | 0.52  | 2.72E-02 | 1.78 | CD97     |
| 5430400L16Rik | 0.09  | 1.83  | 8.22E-02 | 0.51  | 3.06E-02 | 1.88 |          |
| Lass5         | -0.11 | -2.11 | 4.75E-02 | -0.51 | 3.10E-02 | 1.74 | CERS5    |
| Vps35         | 0.16  | 2.23  | 3.70E-02 | 0.5   | 3.28E-02 | 1.51 | VPS35    |
| Rpl13a        | 0.12  | 2.14  | 4.50E-02 | 0.5   | 3.34E-02 | 1.38 | RPL13A   |
| Stxbp4        | -0.14 | -2.11 | 4.80E-02 | -0.5  | 3.42E-02 | 1.9  | STXBP4   |
| Ap1s3         | 0.09  | 1.92  | 6.92E-02 | 0.5   | 3.63E-02 | 0.93 | AP1S3    |
| Fbxl17        | -0.11 | -2    | 5.93E-02 | -0.49 | 3.68E-02 | 1.24 | FBXL17   |
| LOC674707     | 0.12  | 2.08  | 5.00E-02 | 0.49  | 3.80E-02 | 1.25 |          |
| Pak1          | -0.49 | -2.72 | 1.31E-02 | -0.49 | 4.01E-02 | 1.3  | PAK1     |
| 4933436C20Rik | -0.11 | -2.04 | 5.44E-02 | -0.48 | 4.18E-02 | 1.22 |          |
| Grb2          | 0.09  | 1.82  | 8.34E-02 | 0.46  | 5.27E-02 | 0.61 | GRB2     |
| Dynlrb1       | -0.16 | -2.07 | 5.13E-02 | -0.46 | 5.34E-02 | 0.89 | DYNLRB1  |
| Madcaml       | 0.07  | 1.47  | 1.58E-01 | 0.43  | 7.25E-02 | 0.78 | MADCAM1  |

**Appendix 1** to Stacey D, Lourdasamy A, Ruggeri B, et al. A translational systems biology approach in both animals and humans identifies a functionally related module of accumbal genes involved in the regulation of reward processing and binge drinking in males. *J Psychiatry Neurosci* 2015.

DOI: 10.1503/jpn.150138

*Online appendices are unedited and posted as supplied by the authors.*

|       |       |       |          |       |          |      |         |
|-------|-------|-------|----------|-------|----------|------|---------|
| Mgl2  | 0.08  | 1.56  | 1.35E-01 | 0.4   | 9.97E-02 | 0.61 | CLEC10A |
| L1td1 | -0.08 | -1.47 | 1.57E-01 | -0.39 | 1.07E-01 | 0.36 | L1TD1   |
| Epha4 | 0.06  | 1.31  | 2.05E-01 | 0.35  | 1.55E-01 | 0.43 | EPHA4   |
| Il6st | -0.14 | -1.29 | 2.13E-01 | -0.28 | 2.54E-01 | 0.54 | IL6ST   |

**Table S2. Significantly enriched gene ontology (GO) terms for genes in M5 module.** Count, number of genes from the input list in the term; Size, number of genes in each term; *p*-value, raw *p*-value from hypergeometric test; FDR, false discovery rate for multiple test adjustment.

| ID                    | TERM                                                            | Count | Size | <i>p</i> -value | FDR      |
|-----------------------|-----------------------------------------------------------------|-------|------|-----------------|----------|
| GO Biological Process |                                                                 |       |      |                 |          |
| 0006468               | protein phosphorylation                                         | 17    | 532  | 1.04E-04        | 4.01E-02 |
| 0016310               | phosphorylation                                                 | 19    | 642  | 1.12E-04        | 2.89E-02 |
| 0005975               | carbohydrate metabolic process                                  | 9     | 168  | 1.13E-04        | 2.18E-02 |
| 0006006               | glucose metabolic process                                       | 6     | 47   | 1.28E-05        | 9.90E-03 |
| GO Molecular Function |                                                                 |       |      |                 |          |
| 0016740               | transferase activity                                            | 36    | 1298 | 4.47E-07        | 1.49E-04 |
| 0004672               | protein kinase activity                                         | 16    | 454  | 5.33E-05        | 5.92E-03 |
| 0016301               | kinase activity                                                 | 20    | 643  | 3.76E-05        | 6.26E-03 |
| 0000166               | nucleotide binding                                              | 38    | 1857 | 1.98E-04        | 1.65E-02 |
| 0005515               | protein binding                                                 | 51    | 2814 | 3.08E-04        | 2.05E-02 |
| 0004518               | nuclease activity                                               | 6     | 91   | 5.30E-04        | 2.94E-02 |
| 0016772               | transferase activity, transferring phosphorus-containing groups | 14    | 463  | 7.18E-04        | 3.42E-02 |
| 0008092               | cytoskeletal protein binding                                    | 4     | 40   | 9.81E-04        | 3.63E-02 |
| GO Cellular Component |                                                                 |       |      |                 |          |
| 0005737               | cytoplasm                                                       | 103   | 4708 | 1.48E-12        | 2.92E-10 |
| 0005634               | nucleus                                                         | 93    | 4536 | 9.81E-10        | 9.67E-08 |
| 0005622               | intracellular                                                   | 45    | 1751 | 1.27E-07        | 8.37E-06 |
| 0005794               | Golgi apparatus                                                 | 25    | 866  | 1.43E-05        | 7.06E-04 |
| 0005829               | cytosol                                                         | 24    | 843  | 2.67E-05        | 1.05E-03 |
| 0005739               | mitochondrion                                                   | 32    | 1391 | 8.17E-05        | 2.68E-03 |
| 0005768               | endosome                                                        | 12    | 315  | 2.25E-04        | 6.32E-03 |
| 0016020               | membrane                                                        | 81    | 5262 | 9.07E-04        | 2.23E-02 |
| 0005694               | chromosome                                                      | 9     | 240  | 1.50E-03        | 3.28E-02 |
| 0005813               | centrosome                                                      | 10    | 301  | 2.05E-03        | 4.04E-02 |

**Appendix 1** to Stacey D, Lourdasamy A, Ruggeri B, et al. A translational systems biology approach in both animals and humans identifies a functionally related module of accumbal genes involved in the regulation of reward processing and binge drinking in males. *J Psychiatry Neurosci* 2015.

DOI: 10.1503/jpn.150138

*Online appendices are unedited and posted as supplied by the authors.*

**Table S3. List of neuron-marker genes in M5 module.** The list of genes known to be preferentially expressed in mouse astrocytes, microglia, neurons, and oligodendrocytes were obtained from (Cahoy et al. 2008).

| <b>Probe ID</b> | <b>Gene Symbol</b> |
|-----------------|--------------------|
| ILMN_2511868    | 2310002B06Rik      |
| ILMN_2465905    | 2310007O11Rik      |
| ILMN_2749747    | 2410004L22Rik      |
| ILMN_1230834    | A930004K21Rik      |
| ILMN_2847950    | AI837181           |
| ILMN_1242540    | Alg6               |
| ILMN_3160212    | AU021838           |
| ILMN_2774007    | Bub1b              |
| ILMN_2771518    | Capn3              |
| ILMN_1232067    | Ccdc124            |
| ILMN_2973089    | Coq3               |
| ILMN_2638914    | D330027H18Rik      |
| ILMN_2583454    | E030045B01Rik      |
| ILMN_2546510    | EG434402           |
| ILMN_2731999    | Gnptg              |
| ILMN_2663585    | Jdp2               |
| ILMN_1216575    | LOC329506          |
| ILMN_1216281    | Map4k5             |
| ILMN_2901903    | Pigf               |
| ILMN_2848548    | Pts                |
| ILMN_2747754    | Pygb               |
| ILMN_2763772    | Rpap3              |
| ILMN_2704027    | Slc25a18           |
| ILMN_1248132    | Stmn1              |
| ILMN_1232065    | Tmem22             |
| ILMN_3123657    | Vrk1               |
| ILMN_2703621    | Zfp593             |

**Appendix 1** to Stacey D, Lourdasamy A, Ruggeri B, et al. A translational systems biology approach in both animals and humans identifies a functionally related module of accumbal genes involved in the regulation of reward processing and binge drinking in males. *J Psychiatry Neurosci* 2015.

DOI: 10.1503/jpn.150138

*Online appendices are unedited and posted as supplied by the authors.*

**Table S4. List of M5 genes located within mouse QTLs for alcohol preference.** Chr, chromosome; Loci, gene location in Mb on mouse genome.

| Gene Symbol          | Gene Name                                                          | Chr | Loci   |
|----------------------|--------------------------------------------------------------------|-----|--------|
| <i>2410076I21Rik</i> | RIKEN cDNA 2410076I21 gene                                         | 9   | 58.65  |
| <i>4933431K14Rik</i> | RIKEN cDNA 4933431K14 gene                                         | 9   | 85.75  |
| <i>6330562C20Rik</i> | RIKEN cDNA 6330562C20 gene                                         | 3   | 95.31  |
| <i>Adamtsl2</i>      | ADAMTS-like 2                                                      | 2   | 27.08  |
| <i>Alg6</i>          | asparagine-linked glycosylation 6 (alpha-1,3,-glucosyltransferase) | 4   | 99.72  |
| <i>Alg9</i>          | asparagine-linked glycosylation 9 (alpha 1,2 mannosyltransferase)  | 9   | 50.78  |
| <i>Ampd1</i>         | adenosine monophosphate deaminase 1                                | 3   | 103.07 |
| <i>Ankrd35</i>       | ankyrin repeat domain 35                                           | 3   | 96.67  |
| <i>Arl5a</i>         | ADP-ribosylation factor-like 5A                                    | 2   | 52.40  |
| <i>Atm</i>           | ataxia telangiectasia mutated homolog (human)                      | 9   | 53.44  |
| <i>AU019823</i>      | expressed sequence AU019823                                        | 9   | 50.61  |
| <i>Bco2</i>          | beta-carotene oxygenase 2                                          | 9   | 50.53  |
| <i>Celf6</i>         | CUGBP, Elav-like family member 6                                   | 9   | 59.58  |
| <i>Cryab</i>         | crystallin, alpha B                                                | 9   | 50.75  |
| <i>Dcaf17</i>        | DDB1 and CUL4 associated factor 17                                 | 2   | 71.06  |
| <i>Dixdc1</i>        | DIX domain containing 1                                            | 9   | 50.66  |
| <i>Ggtal</i>         | glycoprotein galactosyltransferase alpha 1, 3                      | 2   | 35.40  |
| <i>Gm5617</i>        | predicted gene 5617                                                | 9   | 48.50  |
| <i>Gm9387</i>        | predicted pseudogene 9387                                          | 3   | 128.95 |
| <i>Itgb3bp</i>       | integrin beta 3 binding protein (beta3-endonexin)                  | 4   | 99.77  |
| <i>Lypd6b</i>        | LY6/PLAUR domain containing 6B                                     | 2   | 49.79  |
| <i>Mrpl9</i>         | mitochondrial ribosomal protein L9                                 | 3   | 94.44  |
| <i>Mtnr1b</i>        | melatonin receptor 1B                                              | 9   | 15.86  |
| <i>Neol</i>          | neogenin                                                           | 9   | 58.87  |
| <i>Pgm2</i>          | phosphoglucomutase 2                                               | 4   | 99.93  |
| <i>Pkm</i>           | pyruvate kinase, muscle                                            | 9   | 59.66  |
| <i>Ppcdc</i>         | phosphopantothencysteine decarboxylase                             | 9   | 57.41  |
| <i>Pts</i>           | 6-pyruvoyl-tetrahydropterin synthase                               | 9   | 50.52  |
| <i>Rasl12</i>        | RAS-like, family 12                                                | 9   | 65.40  |
| <i>Rnd3</i>          | Rho family GTPase 3                                                | 2   | 51.13  |
| <i>Rpp25</i>         | ribonuclease P/MRP 25 subunit                                      | 9   | 57.50  |
| <i>Rusc1</i>         | RUN and SH3 domain containing 1                                    | 3   | 89.08  |
| <i>Sapcd2</i>        | suppressor APC domain containing 2                                 | 2   | 25.37  |
| <i>Usp2</i>          | ubiquitin specific peptidase 2                                     | 9   | 44.07  |
| <i>Zbtb43</i>        | zinc finger and BTB domain containing 43                           | 2   | 33.45  |
| <i>Zfp609</i>        | zinc finger protein 609                                            | 9   | 65.69  |

**Appendix 1** to Stacey D, Lourdasamy A, Ruggeri B, et al. A translational systems biology approach in both animals and humans identifies a functionally related module of accumbal genes involved in the regulation of reward processing and binge drinking in males. *J Psychiatry Neurosci* 2015.

DOI: 10.1503/jpn.150138

*Online appendices are unedited and posted as supplied by the authors.*

**Table S5. The phases of haplotype block 3 in *EHD4* and corresponding frequencies in adolescent boys from the IMAGEN study.**

|      | rs1704394 | rs4923919 | rs1648821 | rs4924588 | rs6493012 | rs1025226 | Freq |
|------|-----------|-----------|-----------|-----------|-----------|-----------|------|
| Hap1 | T         | G         | T         | A         | T         | A         | 0.06 |
| Hap2 | T         | G         | C         | A         | T         | C         | 0.10 |
| Hap3 | G         | A         | C         | G         | C         | C         | 0.34 |
| Hap4 | G         | G         | C         | G         | C         | C         | 0.06 |
| Hap5 | G         | G         | C         | A         | C         | C         | 0.45 |

**Table S6. Haplotype analysis of haplotype block 3 in *EHD4*.** Analyses are with binge drinking in 14 year old boys (n=905) and ventral striatal (VS) activity for contrast 10 (reward anticipation) of the monetary incentive delay (MID) task in 14 year old boys (n=608). The omnibus test results were acquired after 10000 permutations.

| Test    | MID task       |          |          |
|---------|----------------|----------|----------|
|         | Binge drinking | Left VS  | Right VS |
| Hap1    | 4.11E-04       | 9.60E-01 | 8.39E-01 |
| Hap2    | 6.96E-01       | 4.89E-01 | 1.74E-01 |
| Hap3    | 1.73E-01       | 9.90E-03 | 2.49E-04 |
| Hap4    | 4.76E-01       | 5.99E-01 | 5.61E-01 |
| Hap5    | 7.66E-01       | 2.31E-02 | 6.87E-03 |
| Omnibus | 1.09E-02       | 9.24E-02 | 6.07E-03 |

**Appendix 1** to Stacey D, Lourdasamy A, Ruggeri B, et al. A translational systems biology approach in both animals and humans identifies a functionally related module of accumbal genes involved in the regulation of reward processing and binge drinking in males. *J Psychiatry Neurosci* 2015.

DOI: 10.1503/jpn.150138

*Online appendices are unedited and posted as supplied by the authors.*

### Supplementary figures

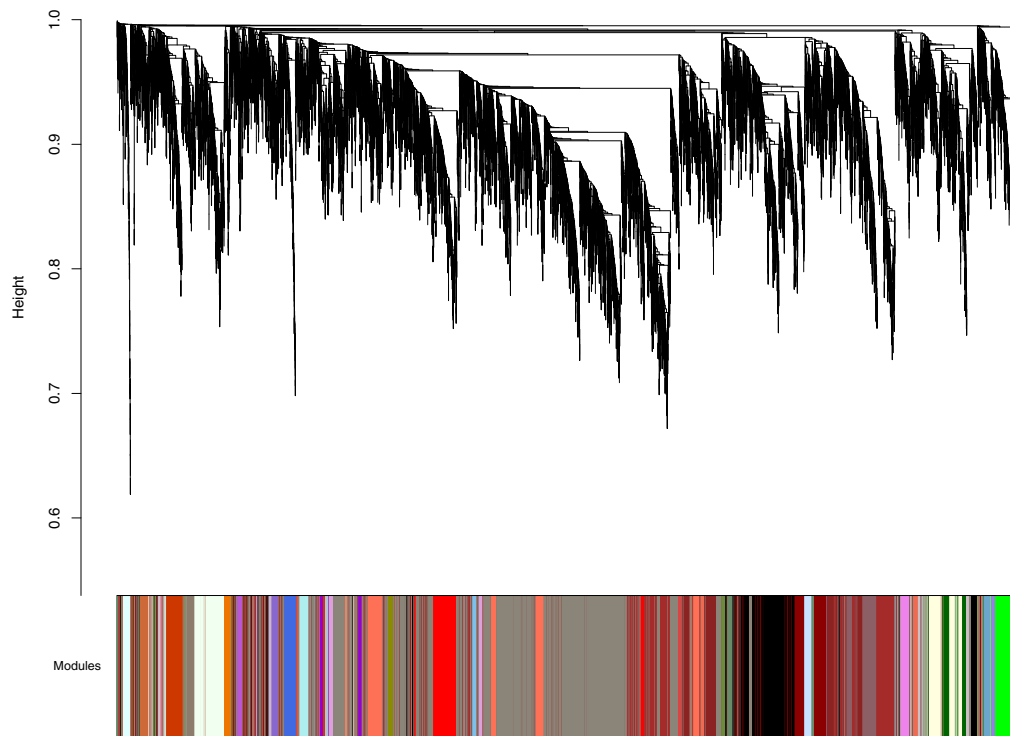

**Fig. S1. Weighted gene co-expression network analysis of mouse VS expression data.** Cluster dendrogram generated by hierarchical clustering of genes on the basis of topological overlap. Modules of correlated genes were assigned colors and are indicated by the horizontal bar beneath the dendrogram, where all unassigned genes were placed in the gray module

**Appendix 1** to Stacey D, Lourdasamy A, Ruggeri B, et al. A translational systems biology approach in both animals and humans identifies a functionally related module of accumbal genes involved in the regulation of reward processing and binge drinking in males. *J Psychiatry Neurosci* 2015.

DOI: 10.1503/jpn.150138

*Online appendices are unedited and posted as supplied by the authors.*

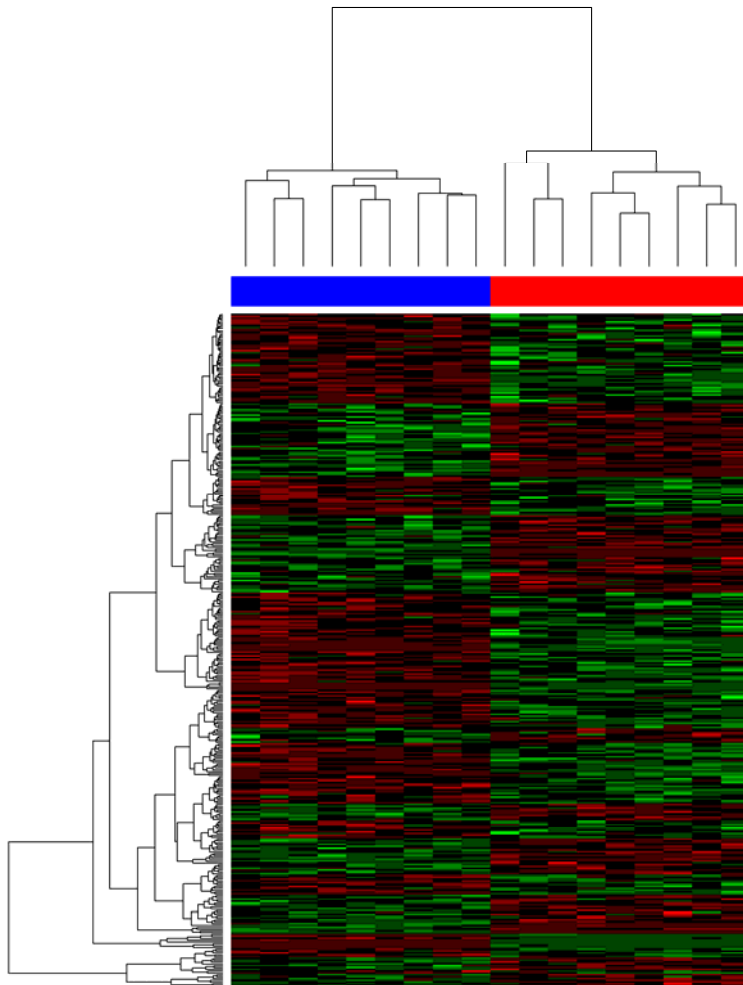

**Fig. S2. Heatmap of genes in the M5 module.** In the heatmap, red represents lower expression whereas green represents higher expression values. Top bar indicates samples: blue, Wild type mice; red, *Rasgrf2*<sup>-/-</sup> mice.



**Appendix 1** to Stacey D, Lourdasamy A, Ruggeri B, et al. A translational systems biology approach in both animals and humans identifies a functionally related module of accumbal genes involved in the regulation of reward processing and binge drinking in males. *J Psychiatry Neurosci* 2015.

DOI: 10.1503/jpn.150138

Online appendices are unedited and posted as supplied by the authors.

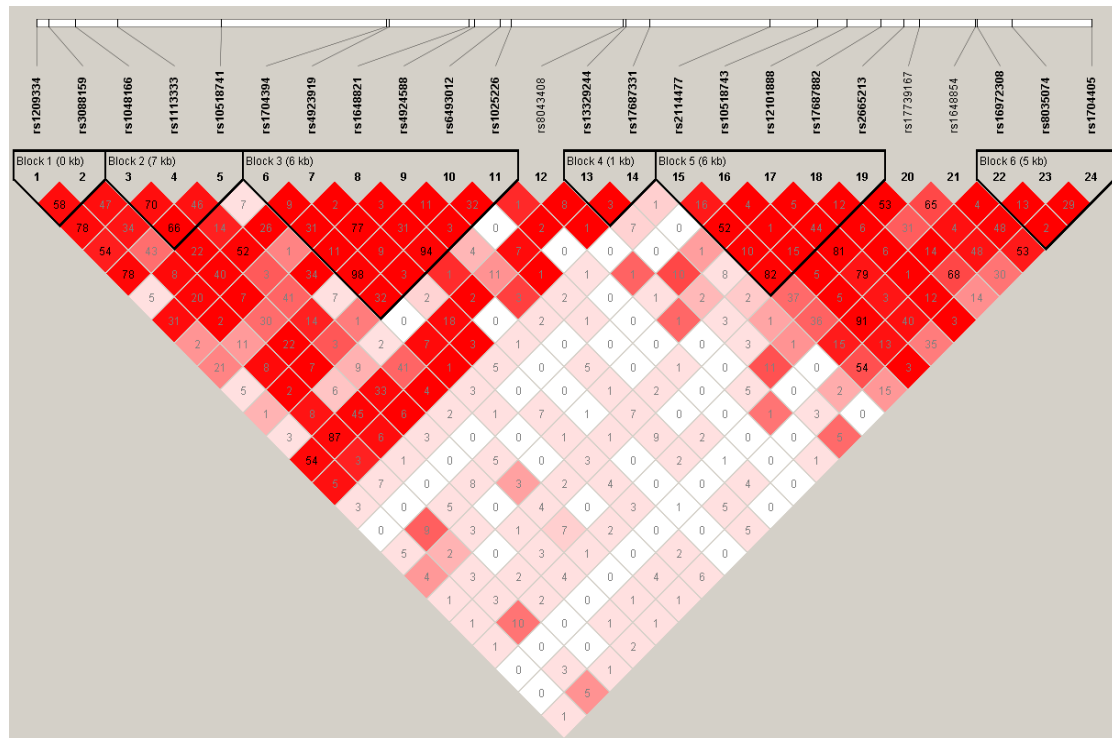

**Fig. S3. Linkage disequilibrium (LD) plot covering the *EHD4* gene.** Results are generated from Haploview. The degree of red in each block indicates the adjusted linkage disequilibrium (LD') between the corresponding pair of SNPs, and their  $r^2$  is given in each block. The haplotype blocks in *EHD4* are also indicated (numbered 1-6).

**Appendix 1** to Stacey D, Lourdusamy A, Ruggeri B, et al. A translational systems biology approach in both animals and humans identifies a functionally related module of accumbal genes involved in the regulation of reward processing and binge drinking in males. *J Psychiatry Neurosci* 2015.

DOI: 10.1503/jpn.150138

*Online appendices are unedited and posted as supplied by the authors.*

### Supplementary references

1. Purcell S, Neale B, Todd-Brown K, et al. PLINK: a tool set for whole-genome association and population-based linkage analyses. *Am J Hum Genet* 2007;81:559–75.
2. Price AL, Patterson NJ, Plenge RM, et al. Principal components analysis corrects for stratification in genome-wide association studies. *Nat Genet* 2006;38:904–9.
3. Cahoy JD, Emery B, Kaushal A, et al. A transcriptome database for astrocytes, neurons, and oligodendrocytes: a new resource for understanding brain development and function. *J Neurosci* 2008;28:264–78.
4. Belknap J, Atkins A. The replicability of QTLs for murine alcohol preference drinking behavior across eight independent studies. *Mamm Genome* 2001;12:893–9.
5. Carmona-Saez P, Chagoyen M, Tirado F, et al. GENECODIS: a web-based tool for finding significant concurrent annotations in gene lists. *Genome Biol* 2007;8:R3.
6. Zhang K, Cui S, Chang S, et al. i-GSEA4GWAS: a web server for identification of pathways/gene sets associated with traits by applying an improved gene set enrichment analysis to genome-wide association study. *Nucleic Acids Res* 2010;38:W90–5.
7. Bach FR, Jordan MI. Kernel independent component analysis. *J Mach Learn Res* 2003;3:1–48.
